# Supplementary material for: Attenuated fusogenicity and pathogenicity of SARS-CoV-2 Omicron variant
Source: Research Square preprint supplement (doi:10.21203/rs.3.rs-1207670/v1), 2022-01-06
Supplement: Supplementary file 1 [file 2743f45534f8b9f8d0d6b229.xlsx]

## Sheet: S1
Supplementary Table 1. Primers used for the construction of Omicron S expression plasmid.
Primer name	Sequence (5'-to-3')
In-fusion-F	tatagggcgaattgggtaccATGTTTGTGTTCCTG
A67V_HV6970del_R	gccattggtgccagagatCACatggaaccaggtcacatt
A67V_HV6970del_F	aatgtgacctggttccatGTGatctctggcaccaatggc
T95I_R	gatgatgttgctcttctcGATgctggcaaagtagactcc
T95I_F	ggagtctactttgccagcATCgagaagagcaacatcatc
GVYY142-145D_R	ggacttgttgttcttgtgGTCcaggaatgggtcattaca
GVYY142-145D_F	tgtaatgacccattcctgGACcacaagaacaacaagtcc
NLVR211-214IVREPE_R	gccctgtggcaggtcCTCGGGCTCTCTCACGATgattggtgtgtgttt
NLVR211-214IVREPE_F	aaacacacaccaatcATCGTGAGAGAGCCCGAGgacctgccacagggc
G339D_R	ggtggcattgaacacctcGTCaaatggacacaggttggt
G339D_F	accaacctgtgtccatttGACgaggtgttcaatgccacc
S371L, S373P, S375F_R	cataacacttgaaggtGAAgaaGGGggcCAGgttgtagagcacagag
S371L, S373P, S375F_F	ctctgtgctctacaacCTGgccCCCttcTTCaccttcaagtgttatg
N440K, G446S_R	gtagttgtagttgccGCTcaccttgctgtccagCTTgttgctgttccagg
N440K, G446S_F	cctggaacagcaacAAGctggacagcaaggtgAGCggcaactacaactac
ST477-478NK, E484A_R	aacagttgaagccGGCcactccattacatggCTTGTTgccagcctggtaa
ST477-478NK, E484A_F	ttaccaggctggcAACAAGccatgtaatggagtgGCCggcttcaactgtt
Q493R, G496S, Q498R_R	cactccATAggttggtctGAAgctATAGGATCTgagtggaaagtaac
Q493R, G496S, Q498R_F	gttactttccactcAGATCCTATagcTTCagaccaaccTATggagtg
Y505H_R	accaccctgtatggttgGTGgcccactccATAggttg
Y505H_F	caaccTATggagtgggcCACcaaccatacagggtggt
T547K_R	tgtcagcactcctgtgccCTTcagtccattgaagttgaa
T547K_F	ttcaacttcaatggactgAAGggcacaggagtgctgaca
N679K_P681H_R	cacagaccttgccctcctATGgctCTTggtctgggtctggtagga
N679K_P681H_F	tcctaccagacccagaccAAGagcCATaggagggcaaggtctgtg
N764K_R	aatgcctgtcagagccctCTTaagttgggtacagaagga
N764K_F	tccttctgtacccaacttAAGagggctctgacaggcatt
D796Y_R	gaagttgaagcctccaaaGTActtgattggaggtgtctt
D796Y_F	aagacacctccaatcaagTACtttggaggcttcaacttc
N856K_R	aggcagcactgtcagtccCTTgaacttctgggcacaaat
N856K_F	atttgtgcccagaagttcAAGggactgacagtgctgcct
Q954H_R	gttcagagcctgggcattGTGgttcaccacatcttggag
Q954H_F	ctccaagatgtggtgaacCACaatgcccaggctctgaac
N969K_R	agaggagatggctccaaaCTTgctggaaagttgcttcac
N969K_F	gtgaagcaactttccagcAAGtttggagccatctcctct
L981F_R	caccttgtccagtctgctGAAgatgtcattcagcacaga
L981F_F	tctgtgctgaatgacatcTTCagcagactggacaaggtg
In-fusion-R	cggtggcggccgctctagatTCAGGTGTAGTGCAG
