# Supplementary material for: Attenuated fusogenicity and pathogenicity of SARS-CoV-2 Omicron variant
Source: Research Square preprint supplement (doi:10.21203/rs.3.rs-1207670/v1), 2022-01-06
Supplement: Supplementary file 2 [file 6ce61010bff5c75f39db46a4.xlsx]

## Sheet: Sheet1
Supplementary Table 2. Summary of the viral sequences used in this study.
A B.1.1 isolate (EPI_ISL_479681)
Reference	Position	Reference	Sample	Quality score	Depth of reference sequence	Depth of sample sequence	Mutation type	ORF	Amino acid change
NC_045512.2	241	C	T	225	0	217	upstream_gene_variant	NSP1	.
NC_045512.2	313	C	T	225	0	138	synonymous_variant	NSP1	.
NC_045512.2	3037	C	T	225	0	201	synonymous_variant	NSP3	.
NC_045512.2	14408	C	T	225	0	145	missense_variant	NSP12_(1b_frame)	P303L
NC_045512.2	23403	A	G	225	0	196	missense_variant	S	D614G
NC_045512.2	28881	GGG	AAC	225	0	184	missense_variant	N	RG203KR
A Delta isolate (EPI_ISL_2378732)
Reference	Position	Reference	Sample	Quality score	Depth of reference sequence	Depth of sample sequence	Mutation type	ORF	Amino acid change
NC_045512.2	210	G	T	225	0	64	upstream_gene_variant	NSP1	.
NC_045512.2	241	C	T	225	0	101	upstream_gene_variant	NSP1	.
NC_045512.2	1191	C	T	225	0	99	missense_variant	NSP2	P129L
NC_045512.2	1267	C	T	228	1	144	synonymous_variant	NSP2	.
NC_045512.2	3037	C	T	228	1	105	synonymous_variant	NSP3	.
NC_045512.2	5184	C	T	225	0	192	missense_variant	NSP3	P822L
NC_045512.2	9891	C	T	225	0	181	missense_variant	NSP4	A446V
NC_045512.2	11418	T	C	225	0	155	missense_variant	NSP6	V149A
NC_045512.2	12102	C	T	225	0	208	missense_variant	NSP8	S4L
NC_045512.2	12946	T	C	225	0	92	synonymous_variant	NSP9	.
NC_045512.2	14408	C	T	225	0	78	missense_variant	NSP12_(1b_frame)	P303L
NC_045512.2	15451	G	A	225	0	80	missense_variant	NSP12_(1b_frame)	G651S
NC_045512.2	16466	C	T	225	0	85	missense_variant	NSP13	P77L
NC_045512.2	17440	C	T	228	12	122	missense_variant	NSP13	P402S
NC_045512.2	18176	C	T	225	0	107	missense_variant	NSP14	P46L
NC_045512.2	19010	A	G	228	15	137	missense_variant	NSP14	D324G
NC_045512.2	20148	C	T	228	1	102	synonymous_variant	NSP15	.
NC_045512.2	20262	A	G	225	0	104	synonymous_variant	NSP15	.
NC_045512.2	21618	C	G	228	1	201	missense_variant	S	T19R
NC_045512.2	21859	C	T	222	42	36	synonymous_variant	S	.
NC_045512.2	21987	G	A	225	0	82	missense_variant	S	G142D
NC_045512.2	22028	GAGTTCA	G	228	9	109	disruptive_inframe_deletion	S	E156_R158delinsG
NC_045512.2	22917	T	G	225	0	86	missense_variant	S	L452R
NC_045512.2	22995	C	A	225	0	116	missense_variant	S	T478K
NC_045512.2	23403	A	G	225	0	185	missense_variant	S	D614G
NC_045512.2	23604	C	G	225	0	97	missense_variant	S	P681R
NC_045512.2	24410	G	A	225	0	140	missense_variant	S	D950N
NC_045512.2	25469	C	T	225	0	91	missense_variant	ORF3a	S26L
NC_045512.2	26767	T	C	228	1	87	missense_variant	M	I82T
NC_045512.2	27638	T	C	225	0	165	missense_variant	ORF7a	V82A
NC_045512.2	27739	C	T	225	0	200	missense_variant	ORF7a	L116F
NC_045512.2	27752	C	T	225	0	169	missense_variant	ORF7a	T120I
NC_045512.2	27832	T	A	148	182	60	missense_variant	ORF7b	I26N
NC_045512.2	28247	AGATTTC	A	228	45	163	conservative_inframe_deletion	ORF8	D119_F120del
NC_045512.2	28461	A	G	225	0	206	missense_variant	N	D63G
NC_045512.2	28881	G	T	225	0	123	missense_variant	N	R203M
NC_045512.2	29402	G	T	225	0	232	missense_variant	N	D377Y
NC_045512.2	29742	G	T	225	0	111	downstream_gene_variant	S	.
An Omicron isolate (EPI_ISL_7418017)
Reference	Position	Reference	Sample	Quality score	Depth of reference sequence	Depth of sample sequence	Mutation type	ORF	Amino acid change
NC_045512.2	21	C	T	100	0	6	upstream_gene_variant	NSP1	.
NC_045512.2	241	C	T	225	0	242	upstream_gene_variant	NSP1	.
NC_045512.2	2832	A	G	225	0	238	missense_variant	NSP3	K38R
NC_045512.2	3037	C	T	225	0	236	synonymous_variant	NSP3	.
NC_045512.2	5386	T	G	225	0	241	synonymous_variant	NSP3	.
NC_045512.2	5673	C	T	225	0	226	missense_variant	NSP3	P985L
NC_045512.2	5730	C	T	225	0	242	missense_variant	NSP3	T1004I
NC_045512.2	6512	AGTTT	AT	228	49	190	disruptive_inframe_deletion	NSP3	S1265_L1266delinsI
NC_045512.2	8393	G	A	225	0	235	missense_variant	NSP3	A1892T
NC_045512.2	10029	C	T	225	0	246	missense_variant	NSP4	T492I
NC_045512.2	10448	CC	TA	228	3	208	missense_variant	NSP5	P132Y
NC_045512.2	11282	AGTTTGTCTGGTTT	AGTTT	220	53	152	disruptive_inframe_deletion	NSP6	L105_G107del
NC_045512.2	11537	A	G	225	0	172	missense_variant	NSP6	I189V
NC_045512.2	11750	C	T	177	177	72	missense_variant	NSP6	L260F
NC_045512.2	13195	T	C	225	0	228	synonymous_variant	NSP10	.
NC_045512.2	14408	C	T	228	2	228	missense_variant	NSP12_(1b_frame)	P303L
NC_045512.2	15240	C	T	225	0	240	synonymous_variant	NSP12_(1b_frame)	.
NC_045512.2	18163	A	G	225	0	237	missense_variant	NSP14	I42V
NC_045512.2	20486	A	C	222	98	143	missense_variant	NSP15	K289T
NC_045512.2	21764	ATACATGT	AT	228	1	152	disruptive_inframe_deletion	S	H69_V70del
NC_045512.2	21846	C	T	225	0	238	missense_variant	S	T95I
NC_045512.2	21986	GGTGTTTATT	G	228	41	162	disruptive_inframe_deletion	S	G142_Y145delinsD
NC_045512.2	22193	AATT	A	222	155	45	disruptive_inframe_deletion	S	N211_L212delinsI
NC_045512.2	22578	G	A	225	0	244	missense_variant	S	G339D
NC_045512.2	22673	TC	CT	225	0	187	missense_variant	S	S371L
NC_045512.2	22679	T	C	225	0	208	missense_variant	S	S373P
NC_045512.2	22686	C	T	225	0	245	missense_variant	S	S375F
NC_045512.2	22813	G	T	225	0	238	missense_variant	S	K417N
NC_045512.2	22882	T	G	225	0	232	missense_variant	S	N440K
NC_045512.2	22898	G	A	225	0	234	missense_variant	S	G446S
NC_045512.2	22992	G	A	225	0	216	missense_variant	S	S477N
NC_045512.2	22995	C	A	225	0	217	missense_variant	S	T478K
NC_045512.2	23013	A	C	225	0	238	missense_variant	S	E484A
NC_045512.2	23040	A	G	225	0	233	missense_variant	S	Q493R
NC_045512.2	23048	G	A	225	0	228	missense_variant	S	G496S
NC_045512.2	23055	A	G	225	0	225	missense_variant	S	Q498R
NC_045512.2	23063	A	T	225	0	220	missense_variant	S	N501Y
NC_045512.2	23075	T	C	225	0	243	missense_variant	S	Y505H
NC_045512.2	23202	C	A	225	0	226	missense_variant	S	T547K
NC_045512.2	23403	A	G	225	0	230	missense_variant	S	D614G
NC_045512.2	23525	C	T	225	0	223	missense_variant	S	H655Y
NC_045512.2	23599	T	G	225	0	243	missense_variant	S	N679K
NC_045512.2	23604	C	A	225	0	224	missense_variant	S	P681H
NC_045512.2	23854	C	A	225	0	239	missense_variant	S	N764K
NC_045512.2	23948	G	T	225	0	236	missense_variant	S	D796Y
NC_045512.2	24130	C	A	225	0	229	missense_variant	S	N856K
NC_045512.2	24424	A	T	225	0	215	missense_variant	S	Q954H
NC_045512.2	24469	T	A	225	0	223	missense_variant	S	N969K
NC_045512.2	24503	C	T	228	1	213	missense_variant	S	L981F
NC_045512.2	25000	C	T	225	0	238	synonymous_variant	S	.
NC_045512.2	25584	C	T	225	0	236	synonymous_variant	ORF3a	.
NC_045512.2	26270	C	T	225	0	237	missense_variant	E	T9I
NC_045512.2	26530	A	G	225	0	218	missense_variant	M	D3G
NC_045512.2	26577	C	G	225	0	217	missense_variant	M	Q19E
NC_045512.2	26709	G	A	225	0	243	missense_variant	M	A63T
NC_045512.2	27259	A	C	225	0	244	synonymous_variant	ORF6	.
NC_045512.2	27807	C	T	225	0	243	synonymous_variant	ORF7b	.
NC_045512.2	28271	A	T	225	0	245	upstream_gene_variant	N	.
NC_045512.2	28311	C	T	225	0	234	missense_variant	N	P13L
NC_045512.2	28361	GGAGAACGCAG	GG	228	42	179	disruptive_inframe_deletion	N	E31_S33del
NC_045512.2	28881	GGG	AAC	225	0	156	missense_variant	N	RG203KR
NC_045512.2	29645	G	T	221	53	191	missense_variant	ORF10	V30L
